# Supplementary material for: Improved characterisation of MRSA transmission using within-host bacterial sequence diversity
Source: eLife journal article supplement (doi:10.7554/elife.46402), 2019-10-08
Supplement: supp [file elife-46402-supp-v1.zip]

Archive with 21 entries (21 files):
- elife_poa_e46402_Figure_7_source_data_1.zip
- elife_poa_e46402_Transparent_Reporting_File.docx
- elife_poa_e46402_Figure_5_source_data_1.zip
- elife_poa_e46402_Supplementary_file_3.docx
- elife_poa_e46402_Figure_5_figure_supplement_1.pdf
- elife_poa_e46402_Figure_6_source_data_1.zip
- elife_poa_e46402_Figure_1_source_data_1.zip
- elife_poa_e46402_Figure_9_source_data_1.zip
- elife_poa_e46402_Table_2_source_data_1.xlsx
- elife_poa_e46402_Figure_9_figure_supplement_1.pdf
- elife_poa_e46402_Figure_4_figure_supplement_1.pdf
- elife_poa_e46402_Figure_8_source_data_1.zip
- elife_poa_e46402_Supplementary_file_1.docx
- elife_poa_e46402_Figure_5_figure_supplement_2.pdf
- elife_poa_e46402_Supplementary_file_2.docx
- elife_poa_e46402_Figure_7_figure_supplement_1.pdf
- elife_poa_e46402_Figure_6_figure_supplement_1.pdf
- elife_poa_e46402_Figure_4_source_data_1.zip
- elife_poa_e46402_Table_1_source_data_1.xlsx
- elife_poa_e46402_Figure_2_source_data_1.zip
- elife_poa_e46402_Figure_2_figure_supplement_1.pdf
