# Supplementary material for: Improved characterisation of MRSA transmission using within-host bacterial sequence diversity
Source: eLife journal article supplement (doi:10.7554/elife.46402), 2019-10-08
Supplement: supp [file elife-46402-supp-v1.zip › elife_poa_e46402_Table_1_source_data_1.xlsx]

## Sheet: Table2.csv
Colonisation A	Colonisation B	Number of A to B transitions			Tips in descendant B subgraphs (median)	Nucleotide diversity transmitted to B (median)	Number of B to A transitions			Tips in descendant A subgraphs (median)	Nucleotide diversity transmitted to A (median)	Direction
		Median	95 % HPD				Median	95% HPD
			Lower	Upper				Lower	Upper
C012	C137	3	2	3	79	1.46e-06	0	0	0	0	NA	A to B
C012	C159b	34	25	38	39	2.2e-06	1	0	6	1	1.4e-06	A to B
C126	C234	3	3	3	10	1.92e-06	0	0	0	0	NA	A to B
C126	C271a	1	1	1	21	3.11e-07	0	0	0	0	NA	A to B
C126	C327a	5	4	5	9	2.68e-06	0	0	0	0	NA	A to B
C183	C194	15	1	23	31	3.4116e-07	5	0	19	12	7.08e-07	Unclear
