# Supplementary material for: Improved characterisation of MRSA transmission using within-host bacterial sequence diversity
Source: eLife journal article supplement (doi:10.7554/elife.46402), 2019-10-08
Supplement: supp [file elife-46402-supp-v1.zip › elife_poa_e46402_Table_2_source_data_1.xlsx]

## Sheet: Sheet1
Subject	Number of Sequences	p-value
		AI	PS	MC
				Axilla	Nose	Throat	Trachea	Wound
T009	31	0.026	1	1*	0.031	1
T012	223	0.24	0.18	1	1	0.14
T065	11	<0.001	1*		0.29		1*
T071	13	0.16	1		0.16		1
T092	12	0.035	1		1	1
T095	11	0.099	1*		0.1	1*
T099	19	1	1*		0.16			1*
T126	239	<0.001	<0.001	0.004	0.1		0.004	1*
T137	79	0.004	1		0.12	1	1*
T159	46	0.7	1	1*	1		1
T183	48	0.04	1	1*	0.22	1
T188	19	1	1*		1		1*
T194	32	0.13	1	1*	1	0.37	1*	1*
T197	35	0.74	1	1	1		1	1
T232	11	<0.001	<0.001		0.001	0.001
T234	10	1	1*		1		1*
T249	14	0.002	<0.001	0.017	0.016	1
T271	23	0.043	1	1*	0.49	1	1*	1*
T327	10	1	1*		0.51	1*
T330	8	1	1*		0.26	1*
T358	22	0.004	1		0.06		1
