# Supplementary figures and images for: Improved characterisation of MRSA transmission using within-host bacterial sequence diversity
Source: eLife journal article supplement (doi:10.7554/elife.46402), 2019-10-08

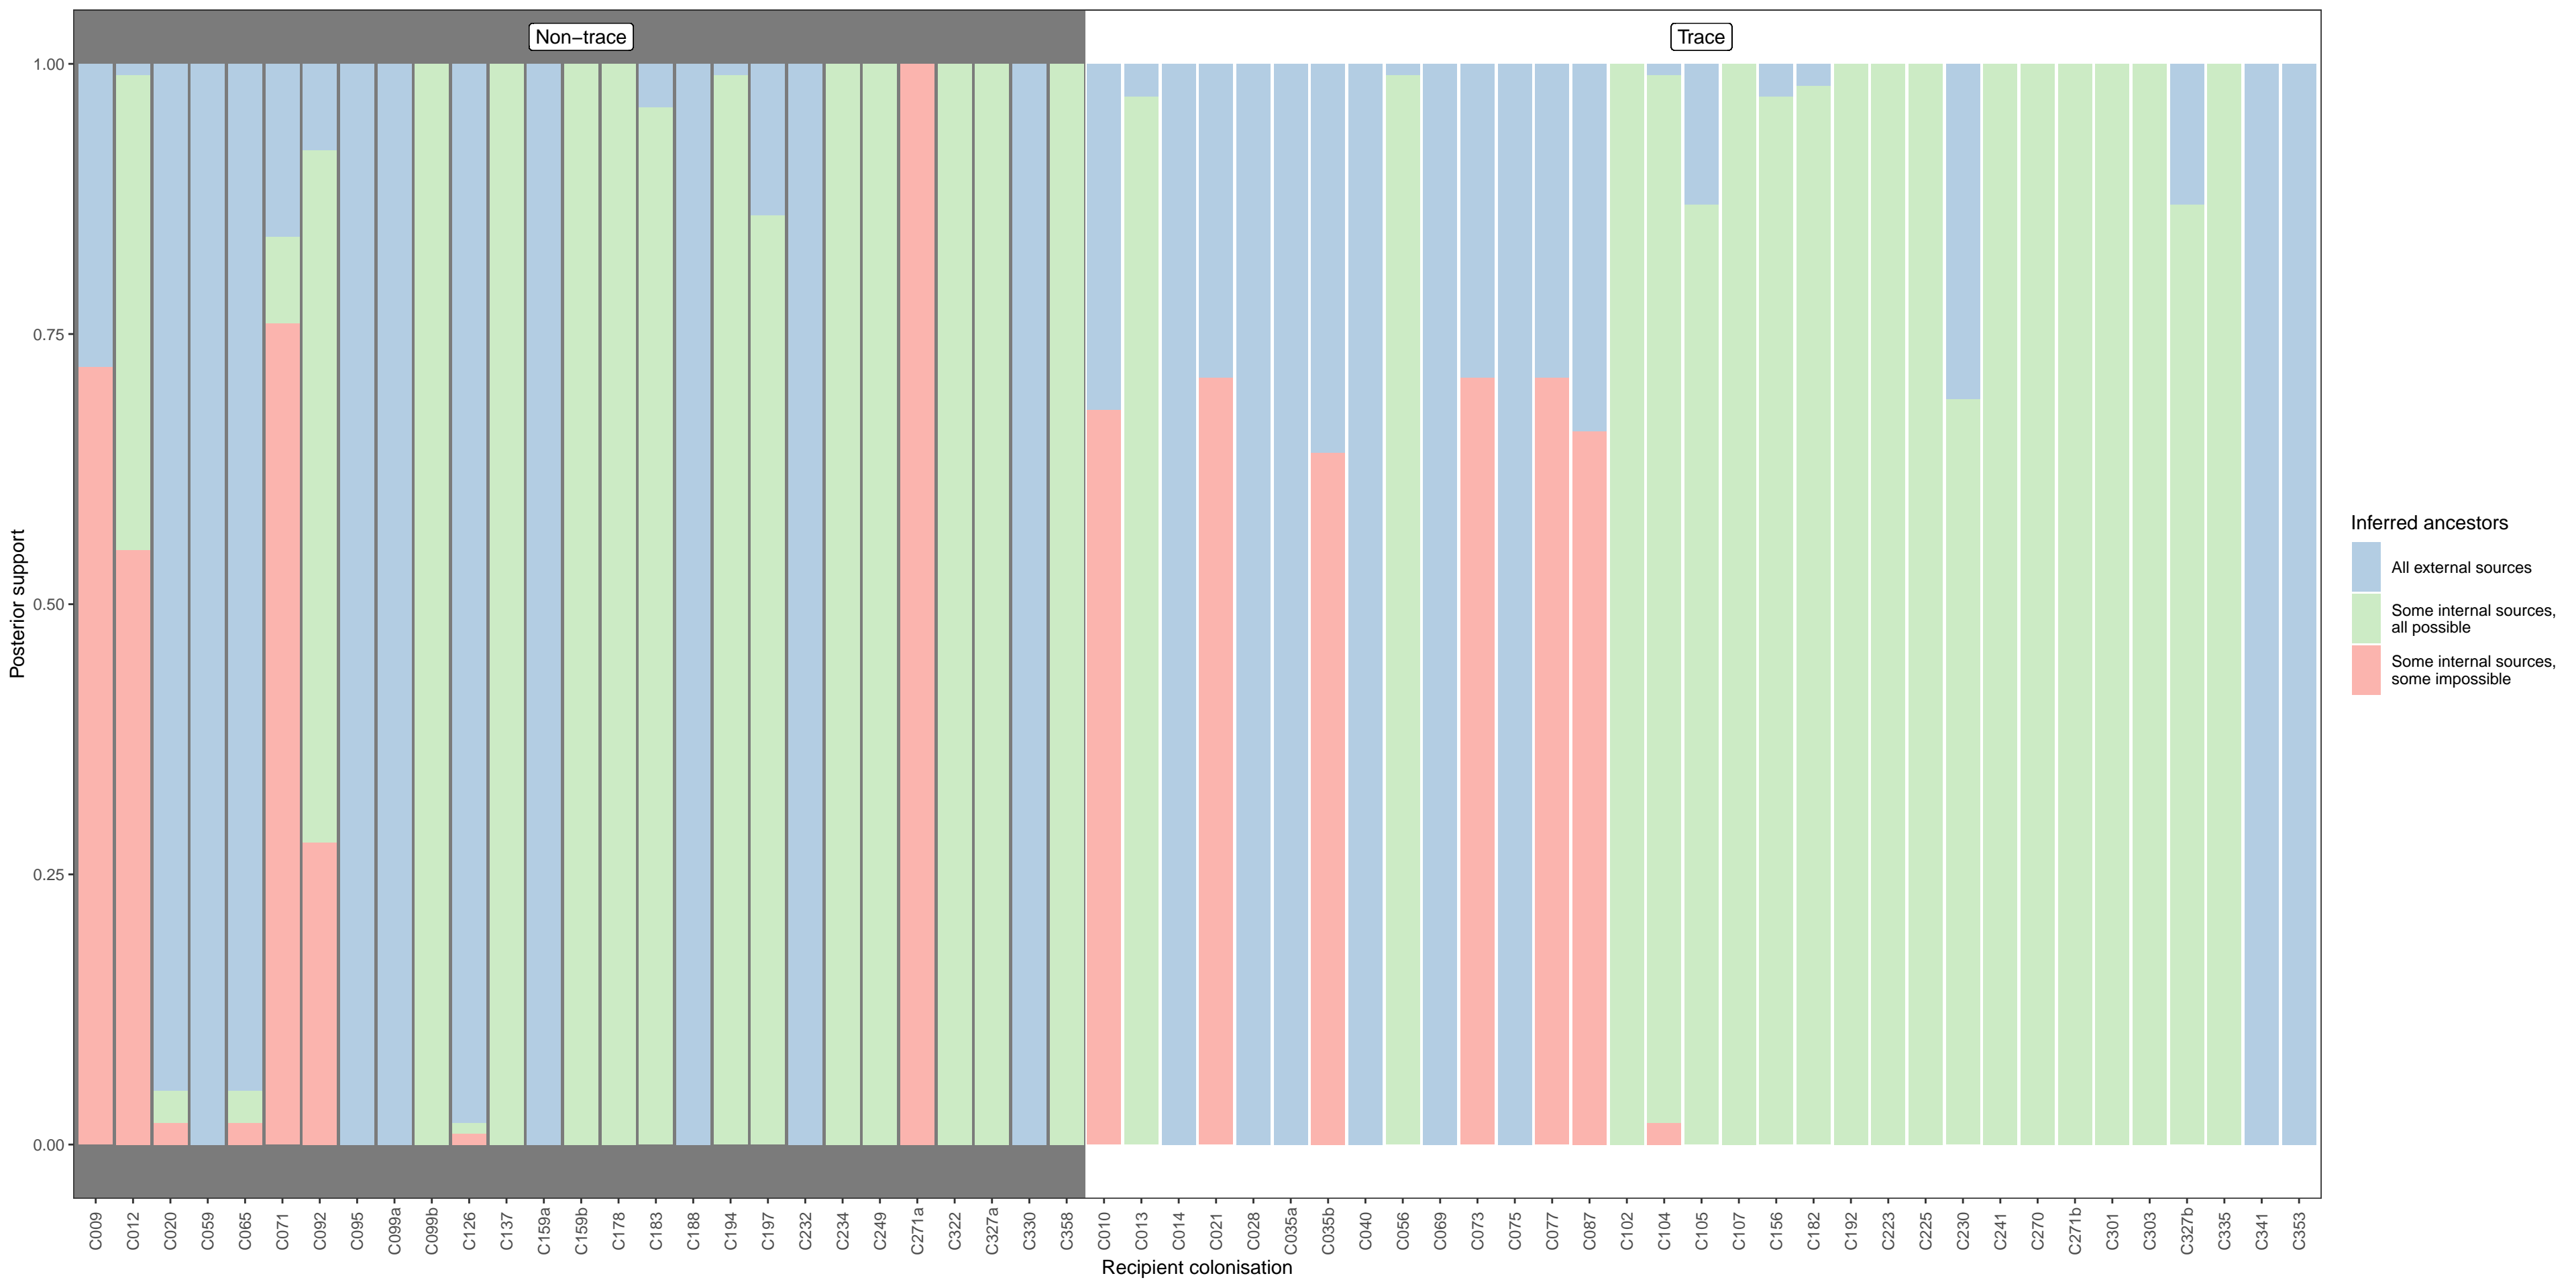

Supplement: supp [file elife-46402-supp-v1.zip › elife_poa_e46402_Figure_5_figure_supplement_1.pdf]

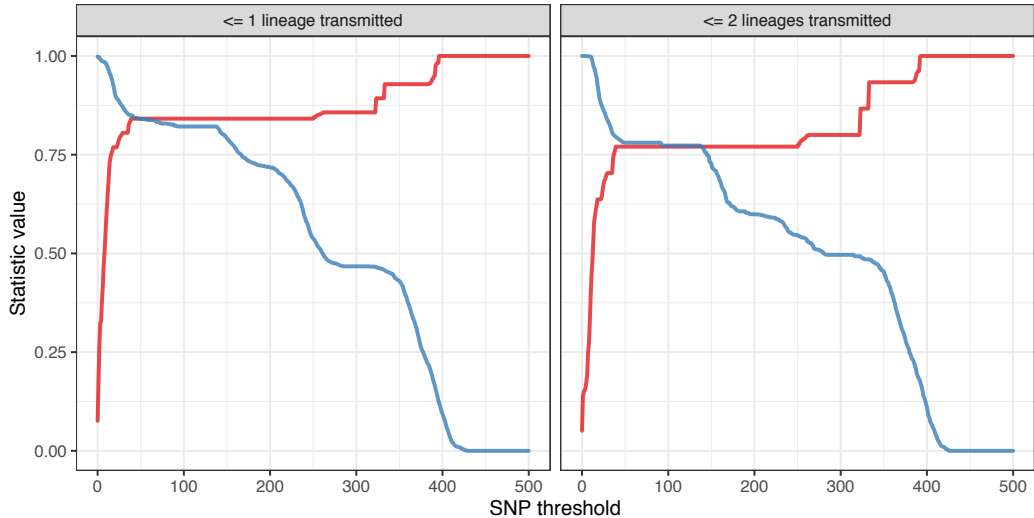

Supplement: supp [file elife-46402-supp-v1.zip › elife_poa_e46402_Figure_9_figure_supplement_1.pdf]

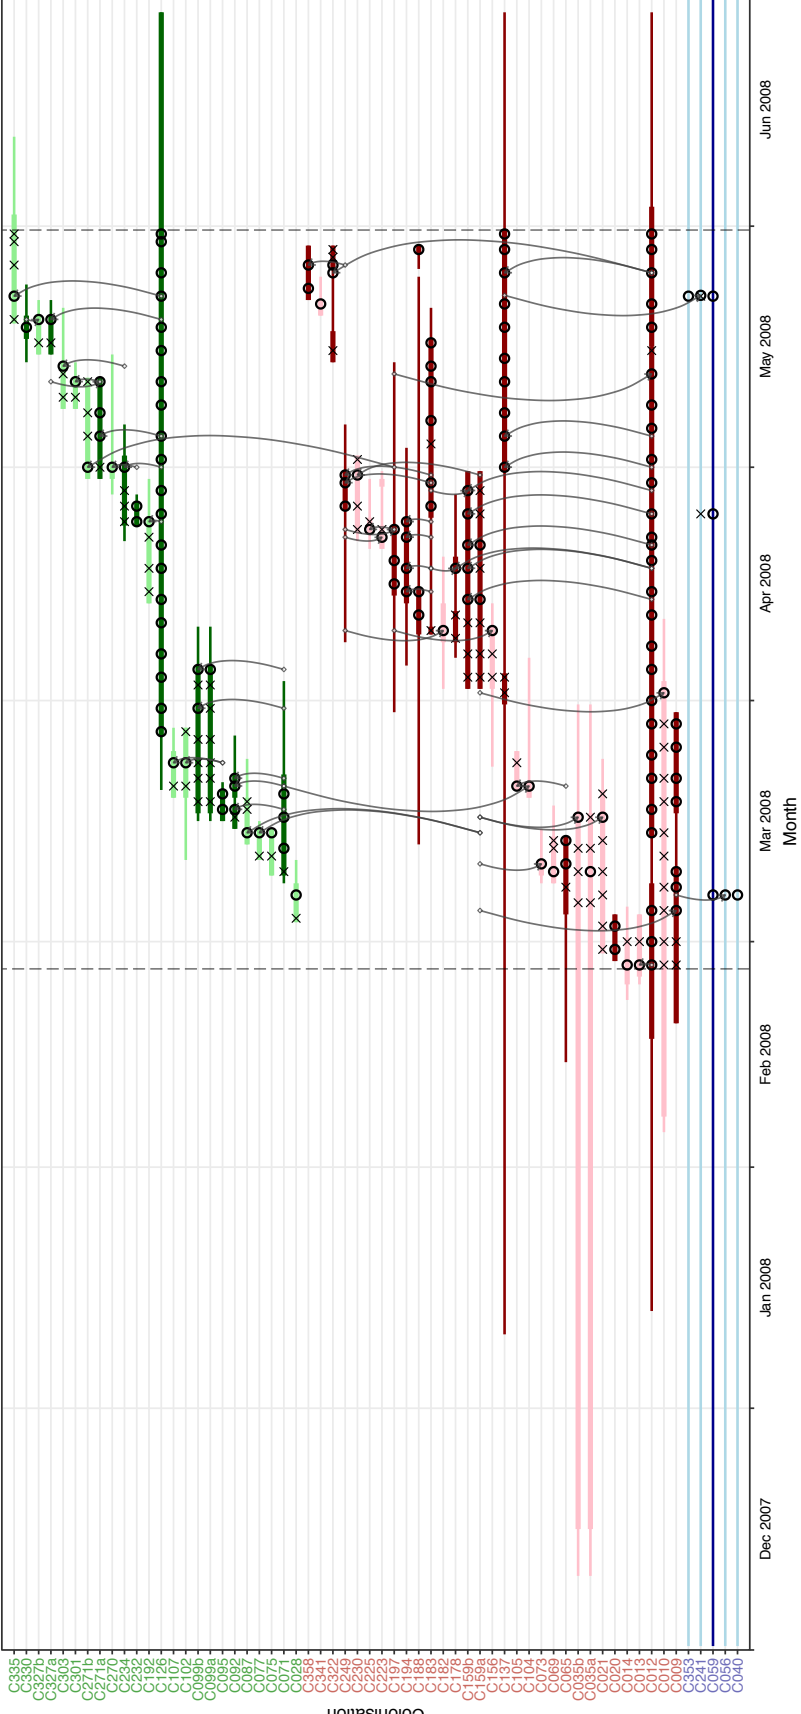

Supplement: supp [file elife-46402-supp-v1.zip › elife_poa_e46402_Figure_4_figure_supplement_1.pdf]

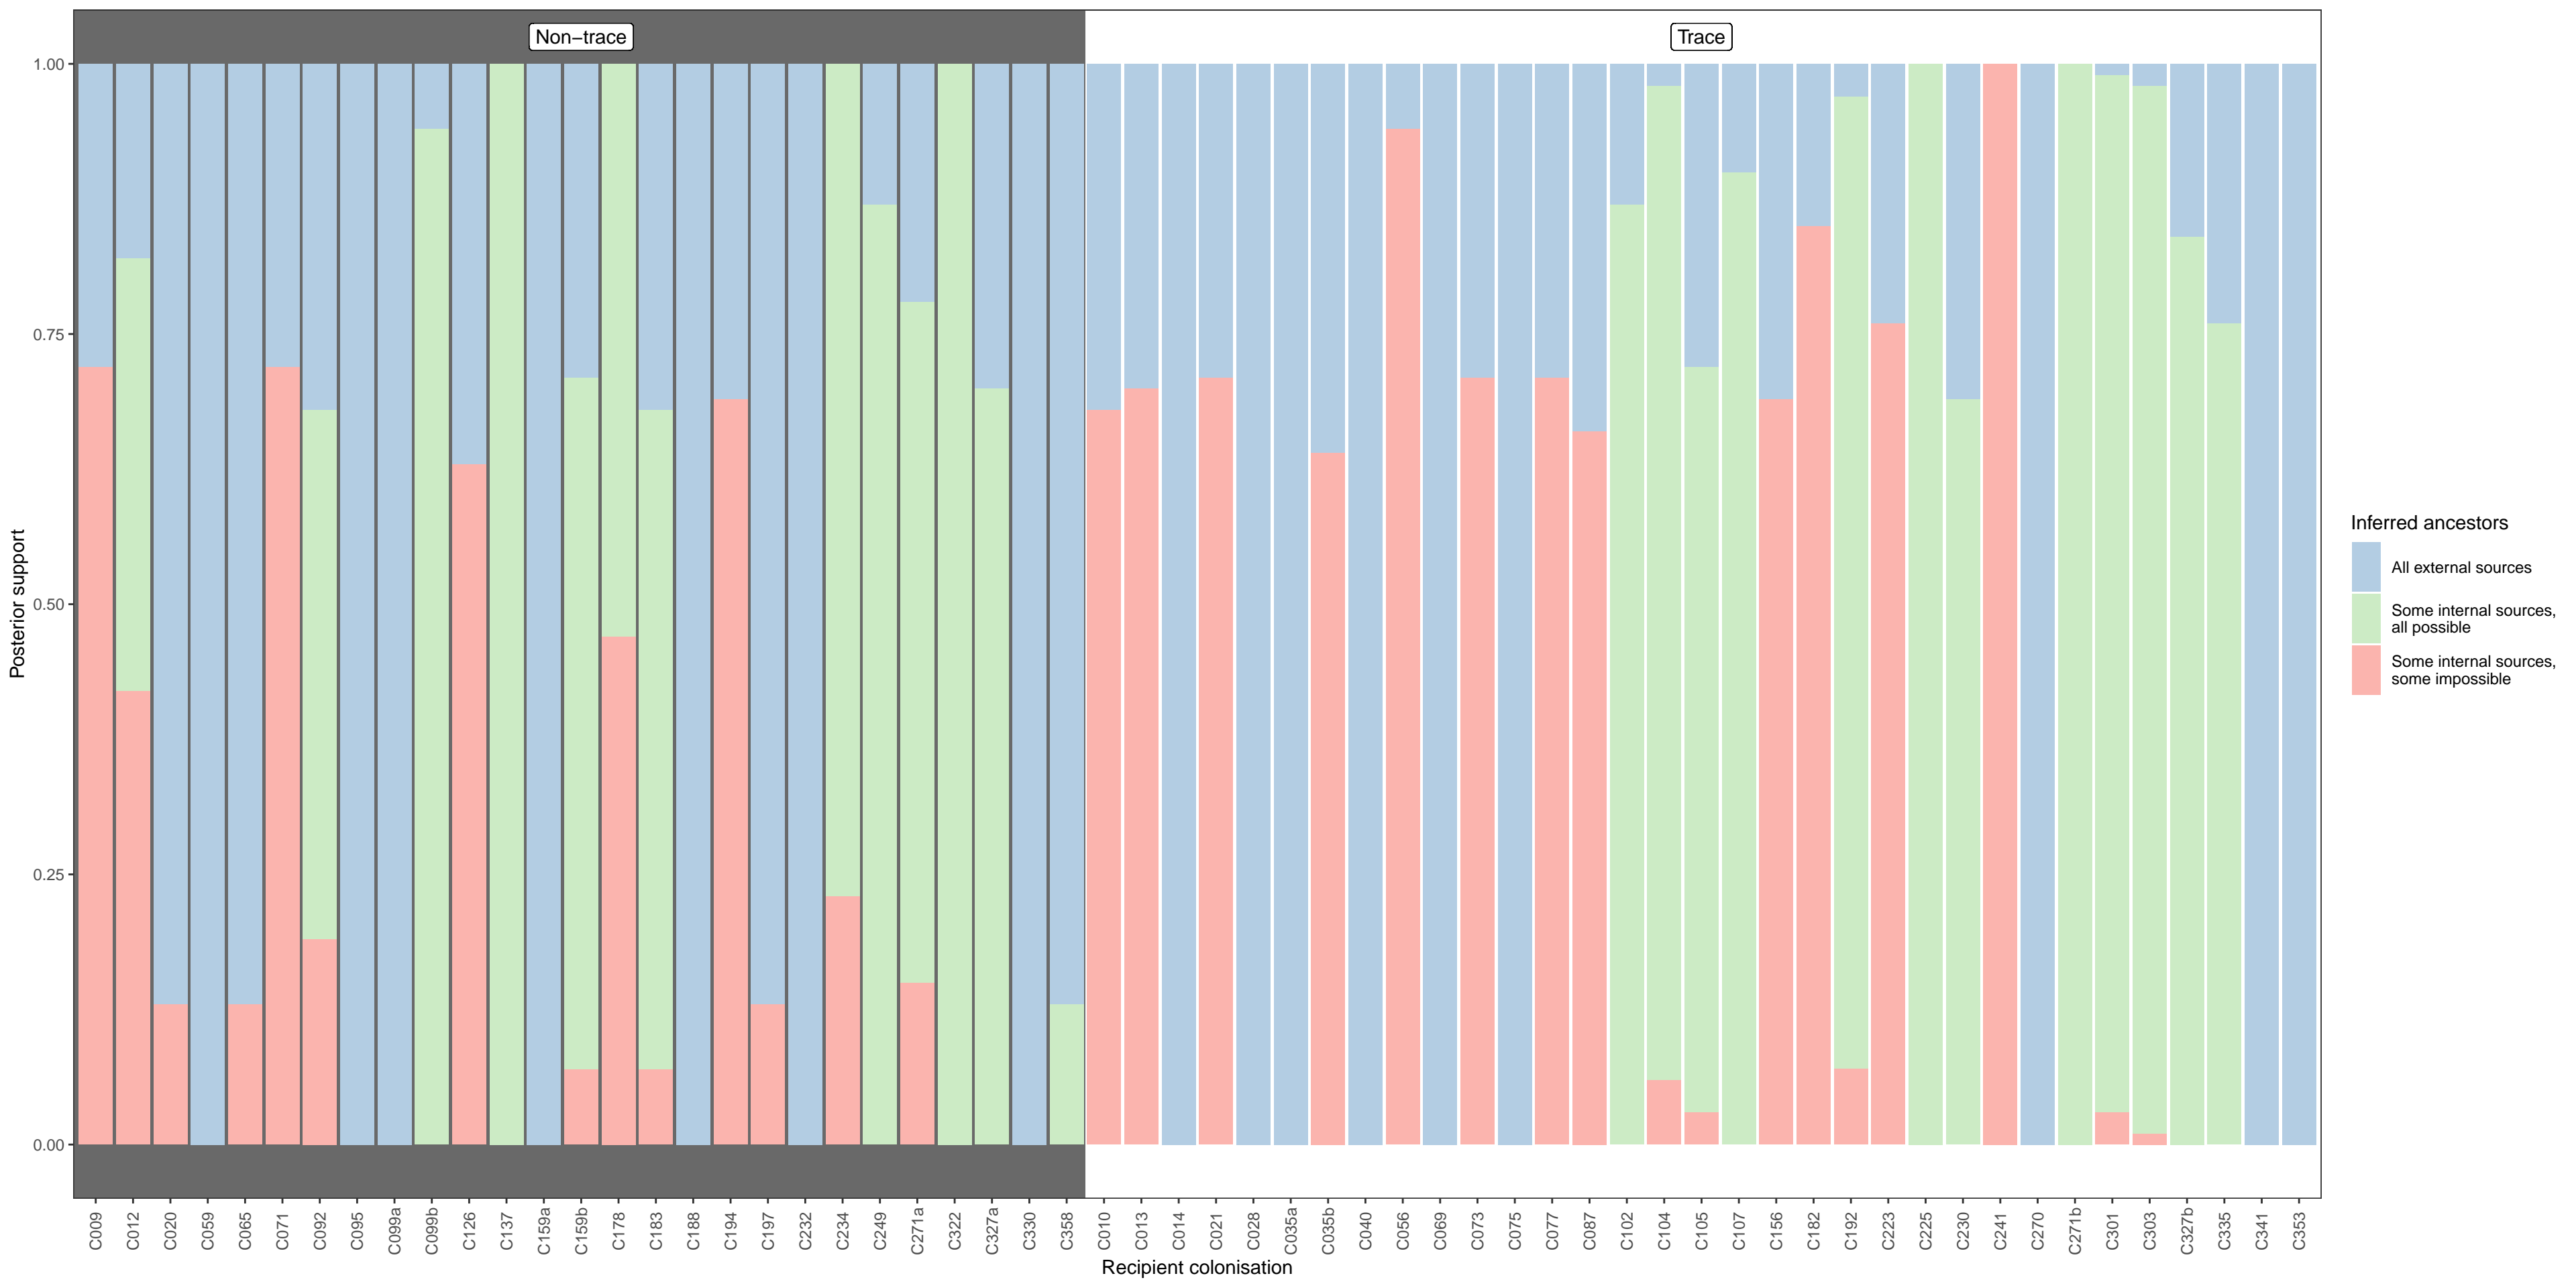

Supplement: supp [file elife-46402-supp-v1.zip › elife_poa_e46402_Figure_5_figure_supplement_2.pdf]

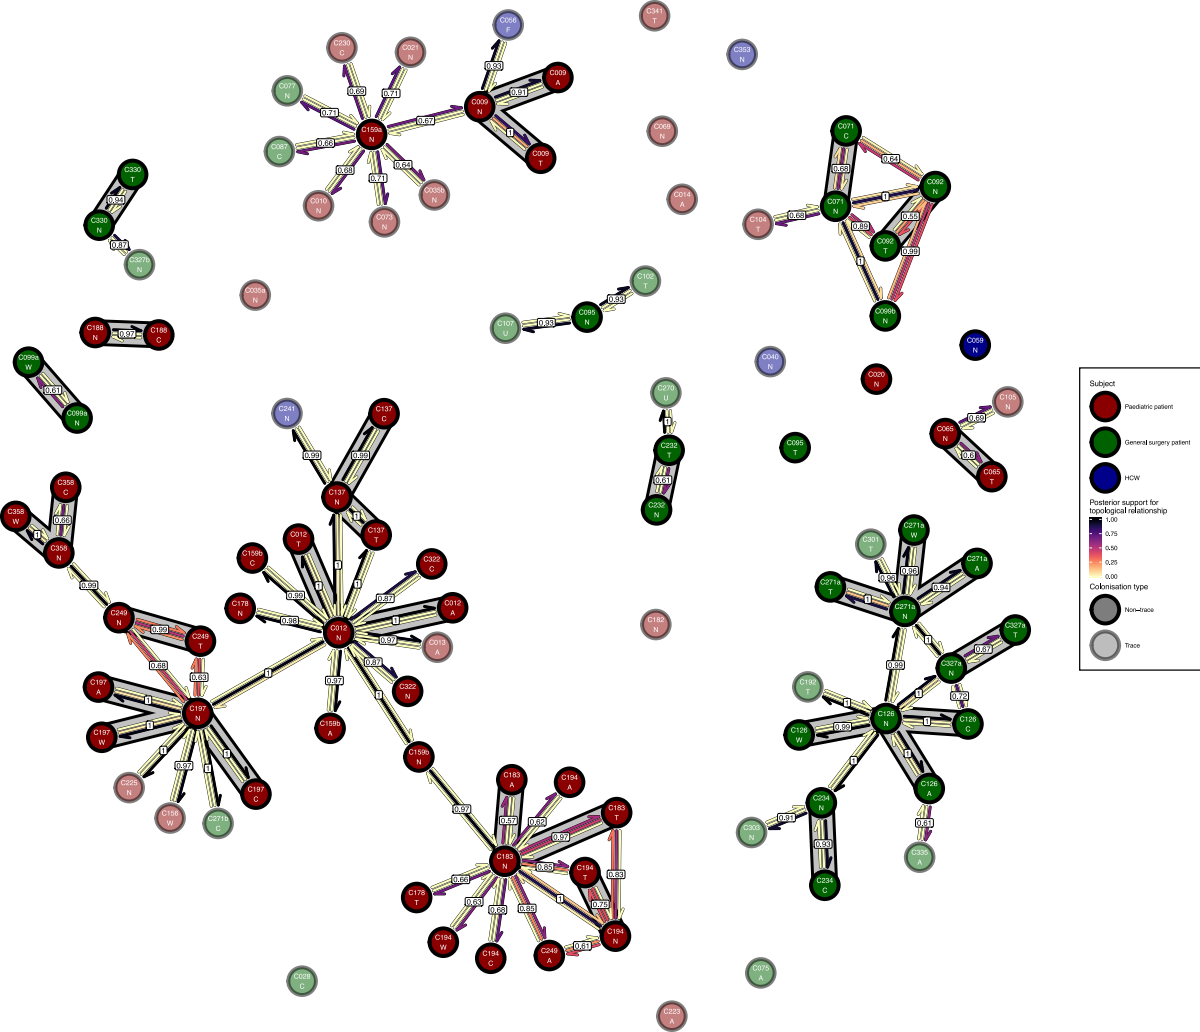

Supplement: supp [file elife-46402-supp-v1.zip › elife_poa_e46402_Figure_7_figure_supplement_1.pdf]

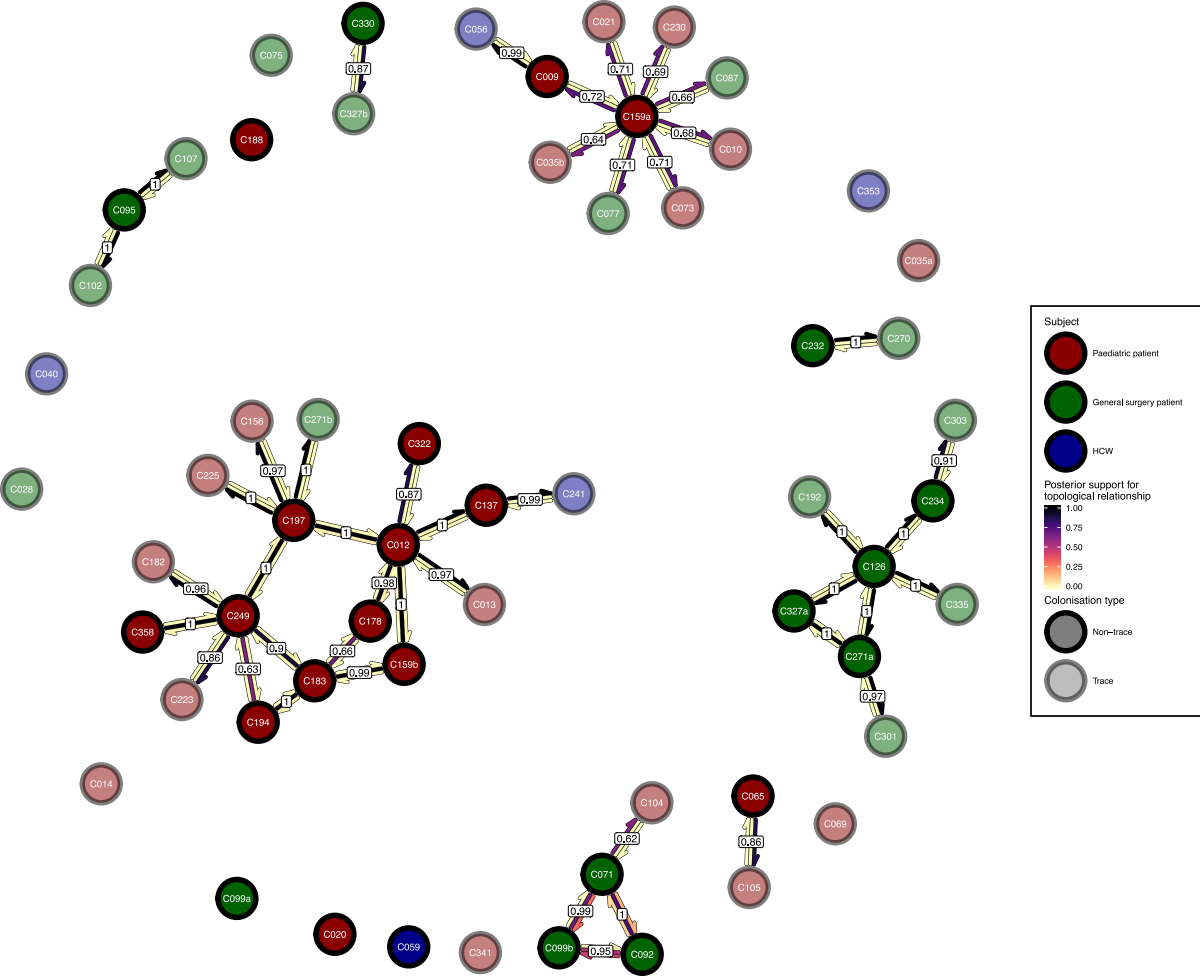

Supplement: supp [file elife-46402-supp-v1.zip › elife_poa_e46402_Figure_6_figure_supplement_1.pdf]

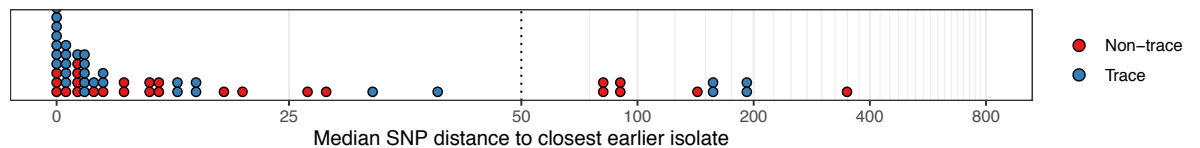

Supplement: supp [file elife-46402-supp-v1.zip › elife_poa_e46402_Figure_2_figure_supplement_1.pdf]
